# Supplementary material for: New cyanido-bridged iron(ii) spin crossover coordination polymers with an unusual ladder-like topology: an alternative to Hofmann clathrates
Source: Royal Society of Chemistry journal article supplement (doi:10.1039/d4dt00870g), 2024-01-01
Supplement: d4dt00870g1.pdf [file d4dt00870g1.pdf]

## Electronic supplementary information

(ESI)

### **New cyanido-bridged iron(II) spin crossover coordination polymers with unusual ladder-like topology: an alternative to Hofmann clathrates**

*Diana Visinescu,<sup>1</sup> Sergiu Shova,<sup>2</sup> Sergii I. Shylin,<sup>3</sup> Ghenadie Novitchi,<sup>4\*</sup> Delia-Laura Popescu<sup>5</sup> and Maria-Gabriela Alexandru<sup>6,\*</sup>*

<sup>1</sup>*“Ilie Murgulescu” Institute of Physical Chemistry, Romanian Academy, Splaiul Independentei 202, Bucharest 060021, Romania.*

<sup>2</sup>*Petru Poni Institute of Macromolecular Chemistry, Romanian Academy, Aleea Grigore Ghica Vodă 41-A, RO-700487 Iasi, Romania*

<sup>3</sup>*Department of Chemistry – Ångström Laboratory, Uppsala University, 75120 Uppsala, Sweden*

<sup>4</sup>*Laboratoire National des Champs Magnétiques Intenses (LNCMI), Univ. Grenoble Alpes, EMFL, CNRS 38042 Grenoble, France. E-mail: ghenadie.novitchi@lncmi.cnrs.fr*

<sup>5</sup>*Inorganic Chemistry Laboratory, Faculty of Chemistry, University of Bucharest, Dumbrava Rosie 23, 020464, Bucharest, Romania*

<sup>6</sup>*Department of Inorganic Chemistry, Physical Chemistry and Electrochemistry, Faculty of Chemical Engineering and Biotechnologies, National University of Science and Technology Politehnica of Bucharest, 1-7 Gh. Polizu Street, 011061 Bucharest, Romania. E-mail: maria.alexandru@up.ro*

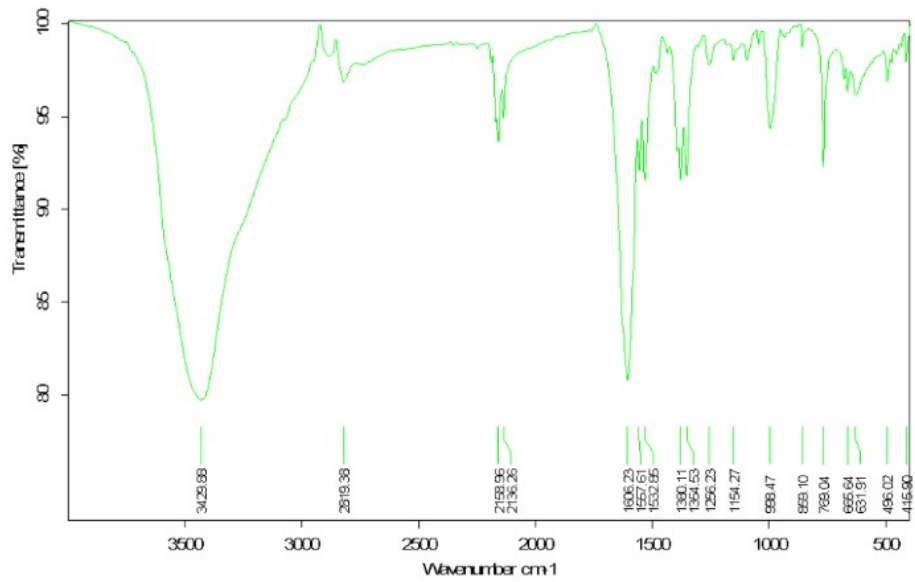

Fig. S1. FTIR spectrum of 1

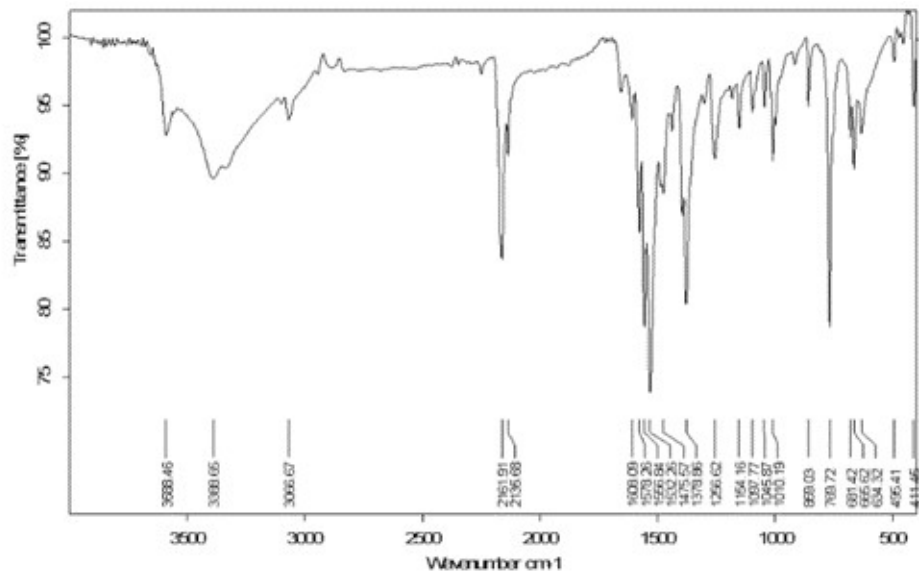

Fig. S2. FTIR spectrum of 2

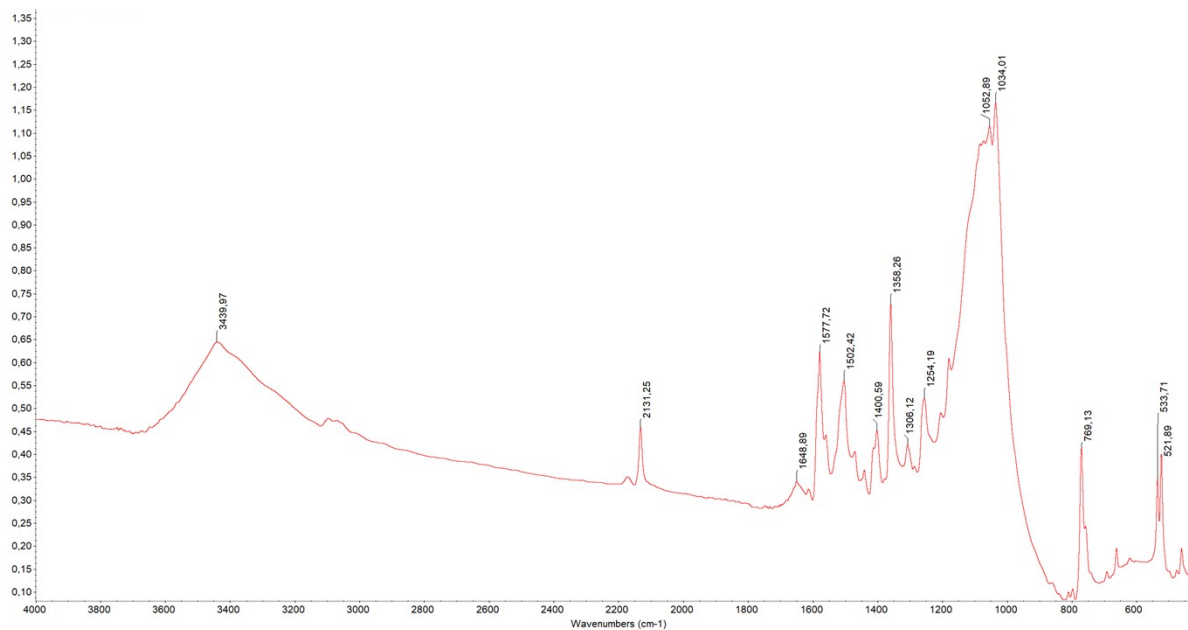

**Fig. S3.** FTIR spectrum of **3**

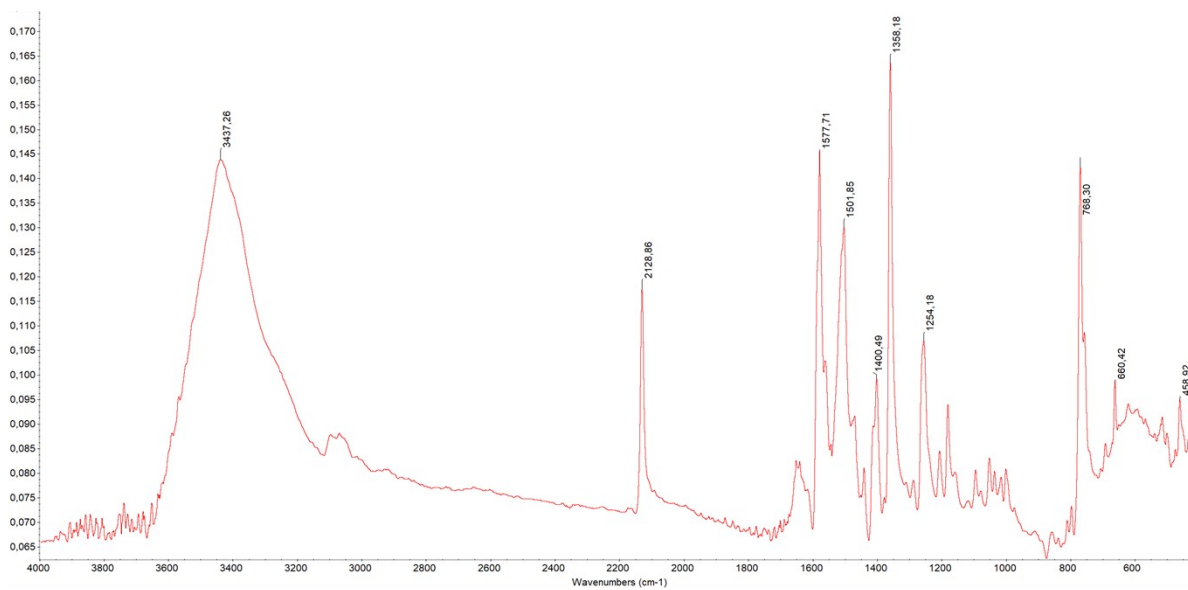

**Fig. S4.** FTIR spectrum of **4**

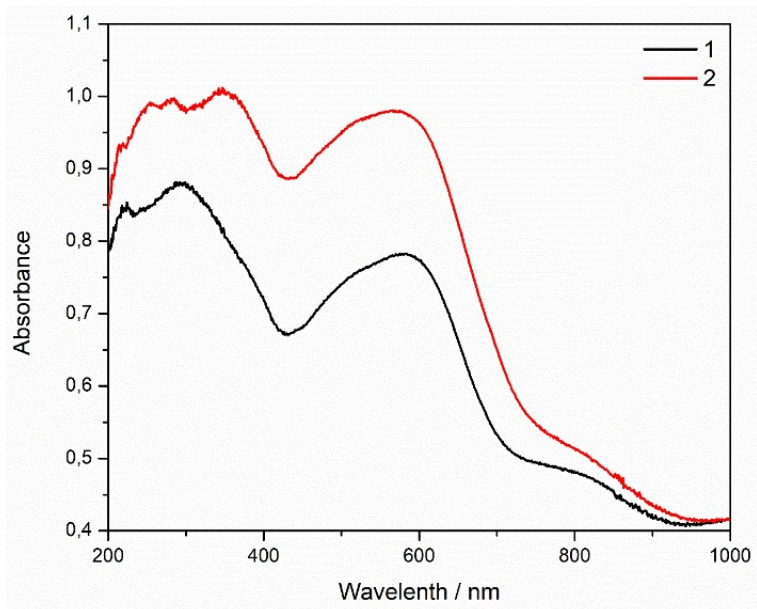

**Fig. S5.** Overlaid UV-Vis spectra of **1** and **2**

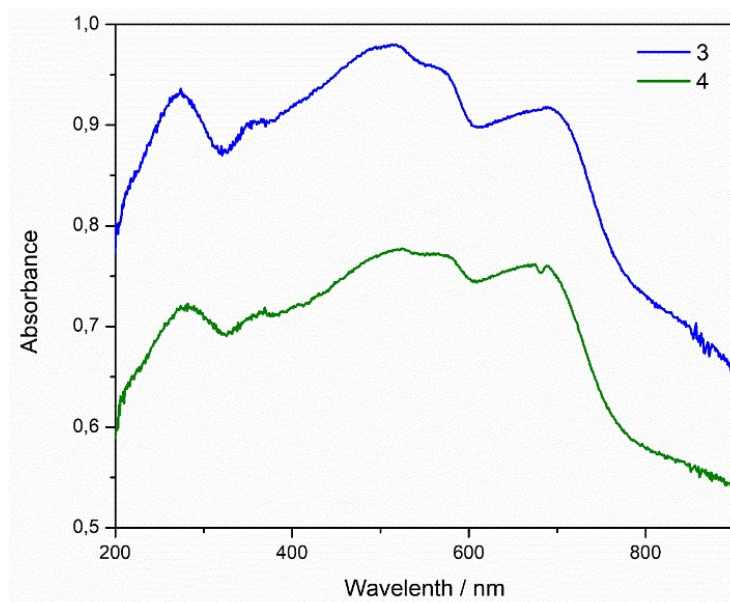

**Fig. S6.** Overlaid UV-Vis spectra of **3** and **4**

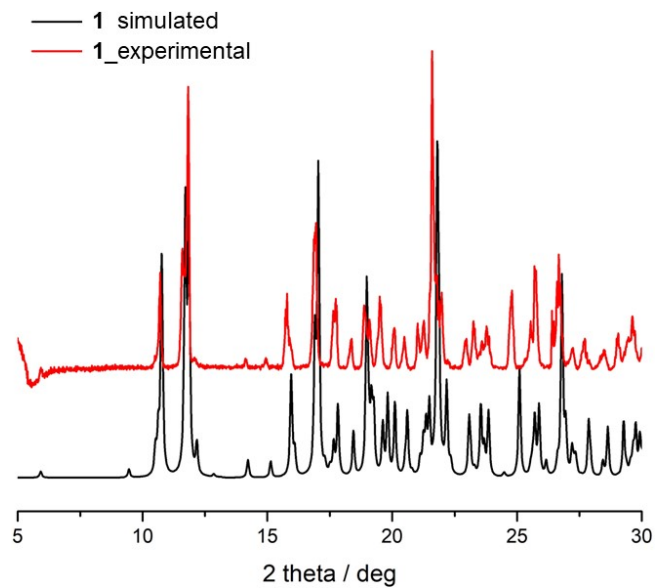

**Fig. S7.** Experimental and calculated powder X-ray diffractograms at room temperature for **1**.

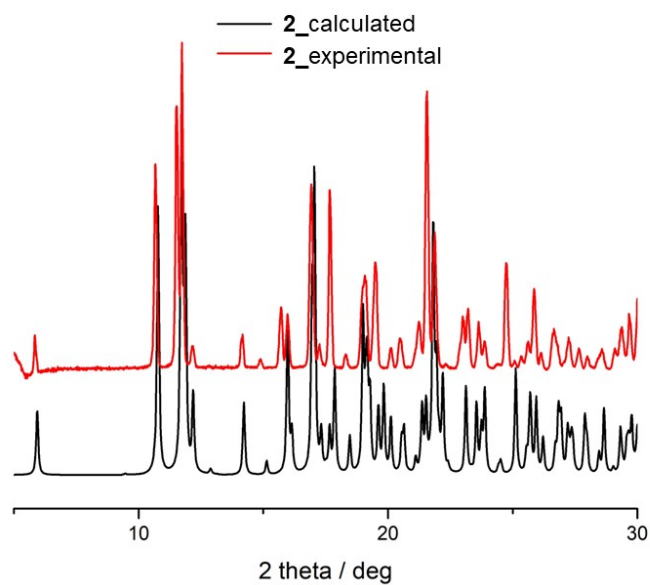

**Fig. S8.** Experimental and calculated powder X-ray diffractograms at room temperature for **2**.

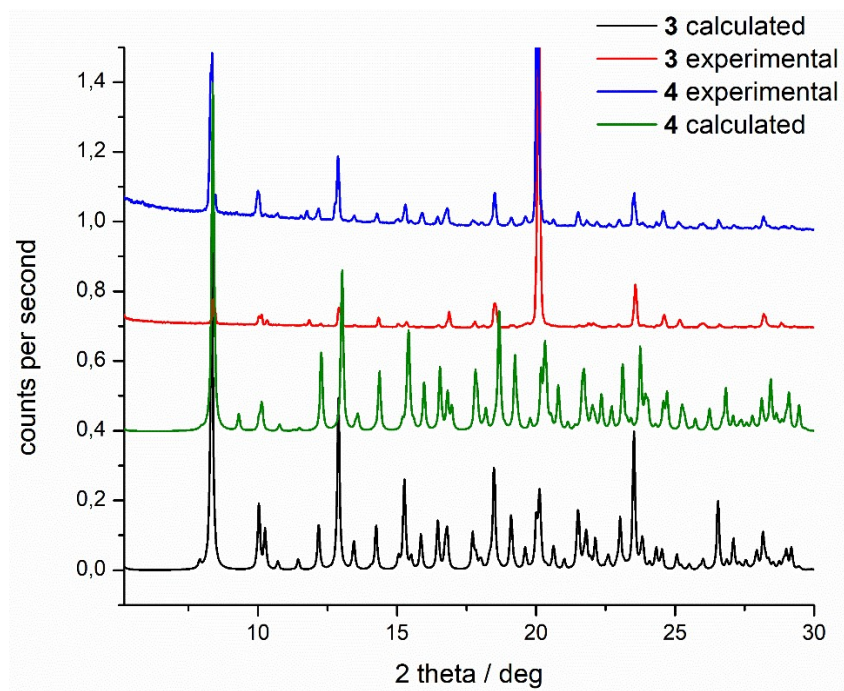

**Fig. S9.** Experimental and calculated powder X-ray diffractograms at room temperature for **3** and **4**.

**Table S1.** Bond lengths (Å) and angles (°) of the iron(II) and M(II) coordination environments in compounds **1** and **2**, respectively; M = Pd (**1**) and Pt (**2**).

|                                          | <b>1</b> (180 K) | <b>1</b> (100 K) | <b>2</b> (120 K) |
|------------------------------------------|------------------|------------------|------------------|
| M1-C19                                   | 1.994(3)         | 1.992(5)         | 1.989(2)         |
| M1-C20                                   | 1.995(3)         | 1.988(6)         | 1.994(2)         |
| M1-C21                                   | 1.990(3)         | 2.002(5)         | 1.987(2)         |
| M1-C22                                   | 1.990(3)         | 1.983(5)         | 1.984(2)         |
| Fe1-N1                                   | 2.249(3)         | 2.166(4)         | 2.249(2)         |
| Fe1-N2                                   | 2.129(3)         | 2.181(5)         | 2.2438(19)       |
| Fe1-N3                                   | 2.246(3)         | 2.043(4)         | 2.2438(19)       |
| Fe1-N7                                   | 2.090(3)         | 2.048(5)         | 2.101(2)         |
| Fe1-N8 <sup>a*</sup>                     | 2.111(3)         | 2.101(5)         |                  |
| Fe1-N9 <sup>a**</sup>                    |                  |                  | 2.091(2)         |
| Fe1-N9 <sup>b*</sup>                     | 2.180(3)         | 2.048(5)         |                  |
| Fe1-N10 <sup>b**</sup>                   |                  |                  | 2.1772(19)       |
| C19-N7-Fe1                               | 175.9(3)         | 174.5(5)         | 174.10(18)       |
| C20-N8-Fe1 <sup>*,**</sup>               | 173.7(2)         | 173.5(4)         |                  |
| C22-N10-Fe1 <sup>c**</sup>               |                  |                  | 172.74(18)       |
| C21-N9-Fe1 <sup>b*,**</sup>              | 173.4(2)         | 175.2(4)         | 175.6(2)         |
| N7-C19-M1                                | 176.8(3)         | 177.7(5)         | 177.3(2)         |
| N8-C20-M1                                | 177.6(3)         | 176.9(5)         | 177.1(2)         |
| N9-C21-M1                                | 178.0(3)         | 178.1(4)         | 176.9(2)         |
| N10-C22-M1                               | 176.9(3)         | 176.4(4)         | 178.1(2)         |
| N9 <sup>b</sup> -Fe1-N8 <sup>a*,**</sup> | 174.55(10)       | 175.2(4)         |                  |
| N1-Fe1-N2                                | 72.62(9)         | 149.41(18)       | 145.65(7)        |
| N3-Fe1-N1                                | 145.60(9)        | 74.95(16)        | 72.63(7)         |
| N3-Fe1-N2                                | 72.99(9)         | 74.45(16)        | 73.03(7)         |
| N7-Fe1-N9 <sup>b*,**</sup>               | 86.97(9)         | 88.13(17)        | 89.38(8)         |
| N7-Fe1-N10 <sup>a**</sup>                |                  |                  | 174.24(7)        |
| N8 <sup>a</sup> -Fe1-N2                  | 100.79(9)        | 89.85(16)        |                  |
| N10 <sup>a</sup> -Fe1-N2                 |                  |                  | 86.54(7)         |
| N9 <sup>b</sup> -Fe1-N1 <sup>*</sup>     | 89.65(9)         | 93.99(16)        |                  |
| N10 <sup>a</sup> -Fe1-N1 <sup>**</sup>   |                  |                  | 89.81(7)         |
| C19-M1-C21                               | 90.72(11)        | 90.6(2)          | 90.19(9)         |
| C20-M1-C19                               | 90.41(11)        | 90.8(2)          | 90.88(9)         |
| C22-M1-C21                               | 87.91(11)        | 91.2(2)          | 90.73(9)         |
| C20-M1-C22                               | 90.91(11)        | 87.4(2)          | 88.17(9)         |

<sup>\*</sup>(a) = 1-x, 1-y, 1-z; (b) = 2-x, -y, 1-z; <sup>\*\*</sup>(a) = 1+x, y, -1+z; (b) = 1-x, 1-y, 1-z; (c) = -1+x, 1+y, 1+z

**Table S2.** Bond lengths (Å) and angles (°) of the iron(II) and M(II) coordination environments in compounds **3** and **4**, respectively; M = Pd (**3**) and Pt (**4**).

|                 | <b>3</b>  | <b>4</b>   |
|-----------------|-----------|------------|
| Fe1-N1          | 2.009(5)  | 1.996(4)   |
| Fe1-N2          | 1.864(5)  | 1.869(4)   |
| Fe1-N3          | 2.001(5)  | 1.983(4)   |
| Fe1-N7          | 1.992(5)  | 1.999(4)   |
| Fe1-N8          | 1.862(5)  | 1.862(4)   |
| Fe1-N9          | 2.014(5)  | 1.999(4)   |
| M1-C37          | -         | 2.006(5)   |
| M1-C38          | 2.009(10) | 2.000(8)   |
| M1-C39          | 2.013(9)  | 1.994(5)   |
| M2-C40          | 2.026(8)  | 2.004(5)   |
| M2-C41          | 2.016(10) | -          |
| N1-Fe1-N2       | 80.0(2)   | 79.56(15)  |
| N1-Fe1-N3       | 158.9(2)  | 158.87(15) |
| N1-Fe1-N7       | 93.1(2)   | 92.26(15)  |
| N1-Fe1-N8       | 96.3(2)   | 98.90(15)  |
| N1-Fe1-N9       | 92.4(2)   | 94.46(15)  |
| N2-Fe1-N3       | 79.1(2)   | 79.61(15)  |
| N2-Fe1-N7       | 101.6(2)  | 95.46(15)  |
| N2-Fe1-N8       | 176.1(2)  | 175.19(15) |
| N2-Fe1-N9       | 98.9(2)   | 105.31(15) |
| N3-Fe1-N7       | 88.3(2)   | 93.21(14)  |
| N3-Fe1-N8       | 104.6(2)  | 102.14(15) |
| N3-Fe1-N9       | 93.6(2)   | 87.63(15)  |
| N7-Fe1-N8       | 79.9(2)   | 80.01(15)  |
| N7-Fe1-N9       | 159.4(2)  | 159.00(15) |
| N8-Fe1-N9       | 79.8(2)   | 79.31(15)  |
| M1-C37-N13      | -         | 177.0(4)   |
| M1-C38-N14      | -         | 176.1(9)   |
| M1-C38-N13      | 177.1(9)  | -          |
| M1-C39-N14      | 178.3(8)  | -          |
| C37-M1-C37a**   | -         | 180.0(2)   |
| C37-M1-C38a     | -         | 88.1(3)    |
| C38-M1-C38a*    | 180.0(4)  | 180.0      |
| C37-M1-C38      | -         | 91.9(3)    |
| C38-M1-C39      | 89.2(3)   | -          |
| C39-M2-C39b**   | -         | 180.0      |
| C39-M2-C40      | -         | 91.41(19)  |
| C39b-M2-C40**   | -         | 88.59(19)  |
| C39b-M2-C40b    | -         | 91.41(19)  |
| C39-M2-C40b**   | -         | 88.59(19)  |
| M2-C39-N15      | -         | 178.8(5)   |
| M2-C40-N16      | -         | 179.2(4)   |
| M2-C40-N15      | 176.2(7)  | -          |
| M2-C41-N16      | 178(3)    | -          |
| M2-C41a-N16a*   | 172(5)    | -          |
| C40-M2-C41      | 87.8(10)  | -          |
| C40-M2-C41b*    | 92.2(10)  | -          |
| C40b-M2-C40*,** | 180.0     | 180.0      |

\*(a) = 2-x, 1-y, 1-z; (b) = 2-x, 2-y, 2-z; \*\*(a) = 2-x,1-y,1-z; (b) = -x, -y, -z



**Table S3.** Summary of the *SHAPE* analysis for the six-coordinated [Fe<sup>II</sup>N<sub>6</sub>] fragments in **1-4**

| CN = 6 <sup>a</sup> | <b>1</b> (180 K) | <b>1</b> (100 K) | <b>2</b>     | <b>3</b>     | <b>4</b>     |
|---------------------|------------------|------------------|--------------|--------------|--------------|
| HP-6                | 33.461           | 33.243           | 33.365       | 33.225       | 32.904       |
| PPY-6               | 22.369           | 23.118           | 22.244       | 22.321       | 21.912       |
| <b>OC-6</b>         | <b>2.636</b>     | <b>2.177</b>     | <b>2.658</b> | <b>2.423</b> | <b>2.484</b> |
| TPR-6               | 11.367           | 11.768           | 11.206       | 11.129       | 10.886       |
| JPPY-6              | 26.578           | 27.331           | 26.455       | 26.467       | 25.992       |

<sup>a</sup> PPY-6, C<sub>5v</sub> Pentagonal pyramid; OC-6, O<sub>h</sub> Octahedron; TPR-6, D<sub>3h</sub> Trigonal prism; JPPY-5, C<sub>5v</sub> Johnson pentagonal pyramid (J2)

**Table S4.** Selected intermolecular contacts for **1**.

| D-H...A                     | d(D-H)/Å | d(H-A)/Å | d(D-A)/Å | D-H-A/° |
|-----------------------------|----------|----------|----------|---------|
| O1W-H1WA...N6 <sup>x</sup>  | 0.87     | 2.03     | 2.856(4) | 159     |
| O1W-H1WB...O2W              | 0.87     | 1.93     | 2.779(4) | 164     |
| O2W-H2WA...O1W <sup>z</sup> | 0.87     | 1.89     | 2.748(4) | 171     |
| O2W-H2WB...N10 <sup>b</sup> | 0.87     | 2.31     | 3.140(4) | 160     |

(x) = 1-x, 2-y, 2-z; (z) = -x, 2-y, 2-z; (b) = -x, 2-y, 1-z

**Table S5.** Selected intermolecular contacts for **2**.

| D-H...A                     | d(D-H)/Å | d(H-A)/Å | d(D-A)/Å | D-H-A/° |
|-----------------------------|----------|----------|----------|---------|
| O2W-H1WA...N6               | 0.87     | 2.04     | 2.859(3) | 157     |
| O1W-H1WB...O2W              | 0.87     | 1.93     | 2.782(3) | 165     |
| O2W-H2WA...O1W <sup>1</sup> | 0.87     | 1.89     | 2.750(3) | 172     |
| O2W-H2WB...N8 <sup>2</sup>  | 0.87     | 2.30     | 3.126(3) | 158     |

(1) = -x, -1-y, -z; (2) = -1-x, -1-y, 1-z

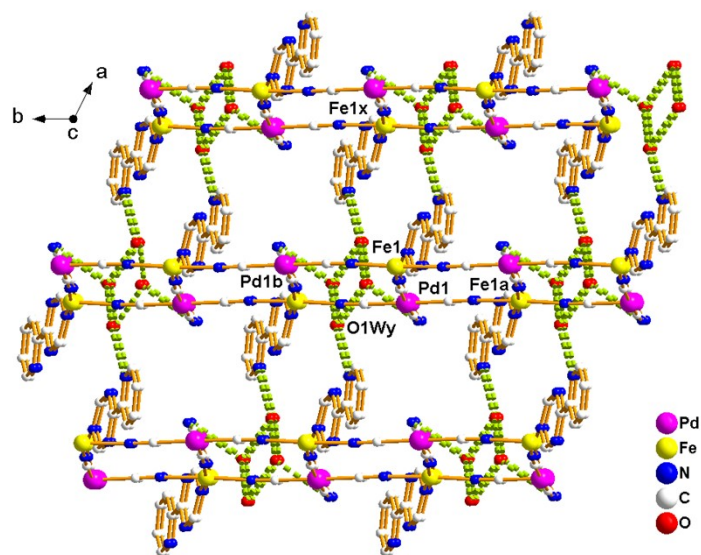

**Fig. S10.** Packing diagram of **1** showing the 3-D supramolecular network through H-bonds [symmetry coded: (b) =  $-x, 2-y, 1-z$ ; (v) =  $x, y, 1+z$ ; (w) =  $-1+x, y, z$ ; (x) =  $1-x, 2-y, 2-z$ ; (y) =  $-x, 2-y, 2-z$ ].

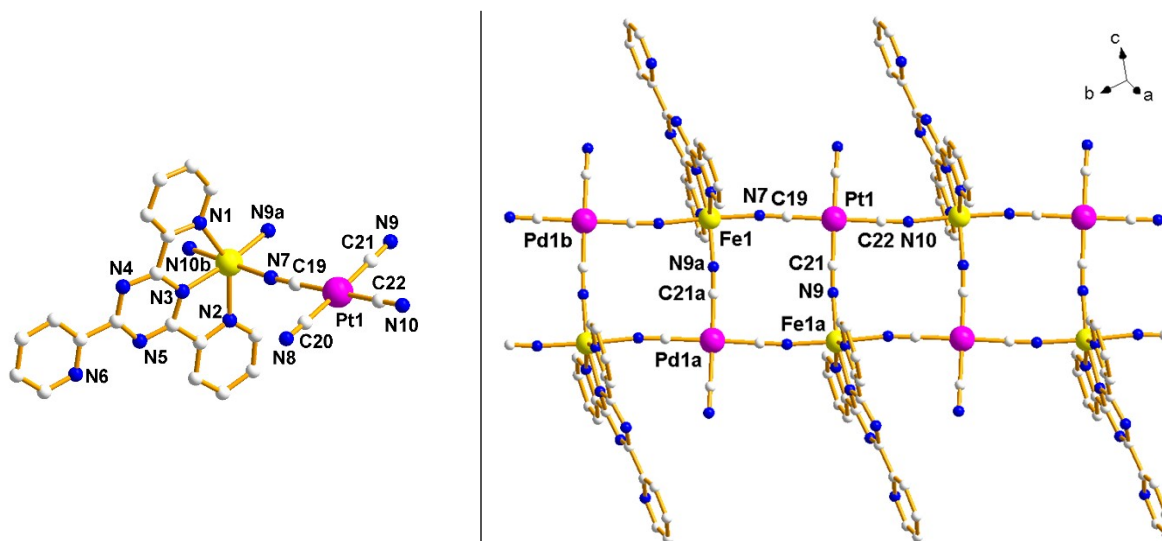

**Fig.S11.** Left. Asymmetric unit of **2**. Right. Fragment of the double chain **2**. (a) =  $1-x, 1-y, -z$ ; (b) =  $-1+x, 1+y, z$ .

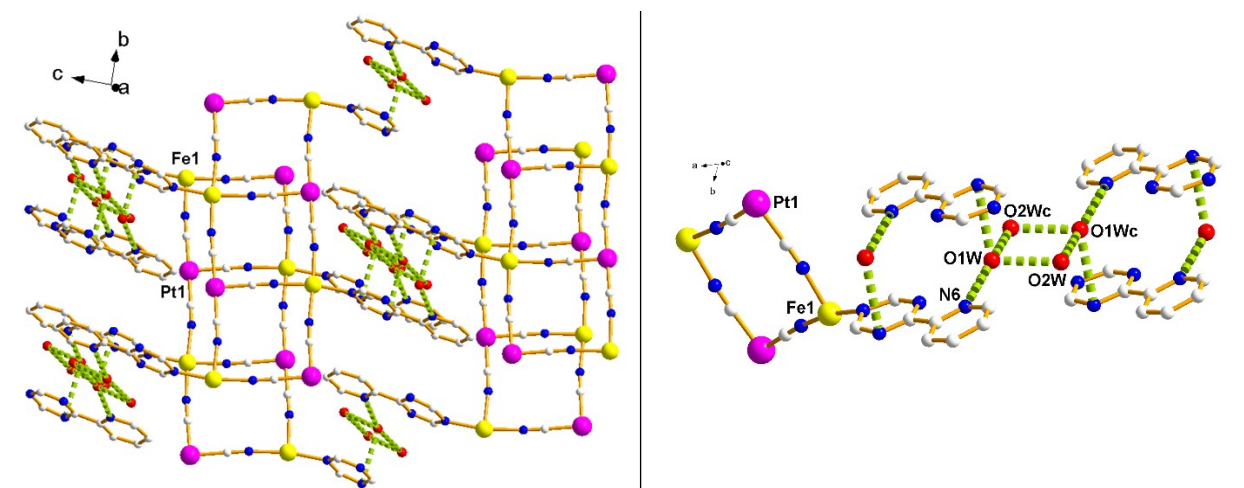

**Fig. S12.** Left: H-Bonds established in **2**. Right: Detail of crystal packing from the 3-D supramolecular network based on hydrogen bonding pattern in **2**. Symmetry code: (c) =  $-1-x, 1-y, 1-z$ .

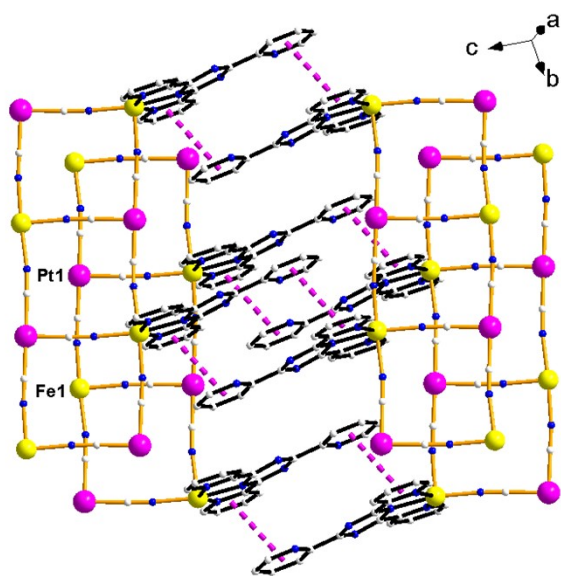

**Fig. S13.**  $\pi$ - $\pi$  stacking interactions in **2** (the centroid-centroid distance of ca. 3.64 Å).

**Table S6.** Selected intermolecular contacts for **3**

| D-H...A                     | d(D-H)/Å | d(H-A)/Å | d(D-A)/Å  | D-H-A/° |
|-----------------------------|----------|----------|-----------|---------|
| O2W-H2WA...N6 <sup>h</sup>  | 0.85     | 2.57     | 2.947(9)  | 108     |
| O2W-H2WA...O4W <sup>g</sup> | 0.85     | 2.57     | 2.935(19) | 107     |
| O2W-H2WB...N15              | 0.85     | 2.11     | 2.901(9)  | 154     |
| O3W-H3WA...O3W <sup>d</sup> | 0.85     | 2.45     | 2.890(19) | 113     |
| O3W-H3WA...O4W <sup>d</sup> | 0.85     | 2.26     | 2.78(2)   | 120     |
| O3W-H3WB...N16              | 0.85     | 2.52     | 2.797(19) | 100     |
| O1W-H1WA...O2W              | 0.85     | 2.12     | 2.944(9)  | 162     |
| O1W-H1W...BN13 <sup>h</sup> | 0.85     | 2.13     | 2.933(11) | 157     |

(d) = 1-x, 1-y, 2-z; (g) = 1-x, 2-y, 2-z; (h) = x, 1+y, z.

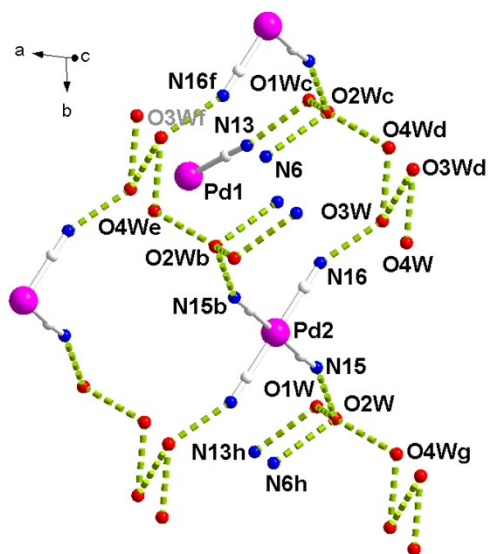

**Fig. S14.** Detail of crystal packing from the 3-D supramolecular network based on hydrogen bonding pattern in **3**. Symmetry codes: (b) = 2-x, 1-y, 1-z; (c) = x, -1+y, z; (d) = 1-x, 1-y, 2-z; (e) = 1+x, y, z; (f) = 2-x, 1-y, 2-z; (g) = 1-x, 2-y, 2-z; (h) = x, 1+y, z.

**Table S7.** Selected intermolecular contacts for **4**

| D-H...A                     | d(D-H)/Å | d(H-A)/Å | d(D-A)/Å  | D-H-A/° |
|-----------------------------|----------|----------|-----------|---------|
| O2W-H2WA...O1W <sup>1</sup> | 0.87     | 1.96     | 2.778(12) | 156     |
| O5W-H5WA...N15 <sup>3</sup> | 0.87     | 2.11     | 2.940(6)  | 159     |
| O5W-H5WB...O4W              | 0.85     | 2.06     | 2.901(5)  | 170     |
| O1W-H1WA...O2W <sup>1</sup> | 0.85     | 2.44     | 2.778(12) | 105     |
| O1W-H1WB...N14              | 0.88     | 2.23     | 2.859(12) | 128     |
| O4W-H4WA...N12 <sup>4</sup> | 0.87     | 2.12     | 2.919(6)  | 152     |
| O4W-H4WB...N13 <sup>5</sup> | 0.87     | 2.04     | 2.889(6)  | 164     |

(1) = 1-x, -y, 1-z; (2) = 1-x, 1-y, 1-z; (3) = 1-x, 1-y, -z; (4) = x, 1+y, z; (5) = 2-x, 1-y, 1-z.

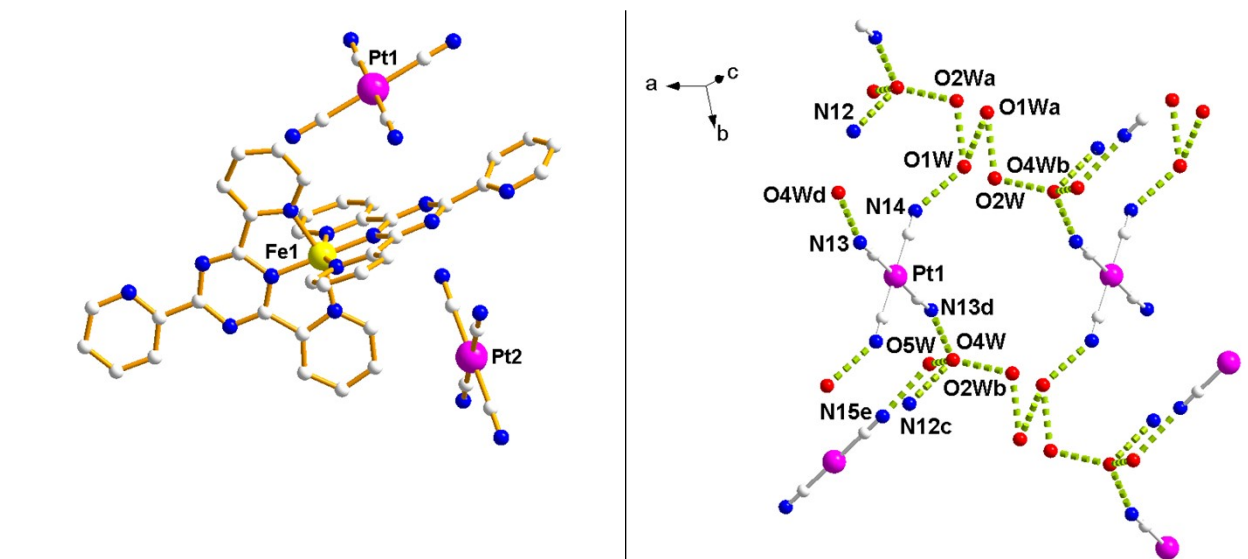

**Fig. S15.** Left: structure of **4**; Right: excerpt from the 3-D supramolecular network based on hydrogen bonding pattern in **4**. Symmetry codes: (a) = 1-x, -y, 1-z; (b) = 1-x, 1-y, 1-z; (c) = x, 1+y, z; (d) = 2-x, 1-y, 1-z; (e) = 1-x, 1-y, -z.

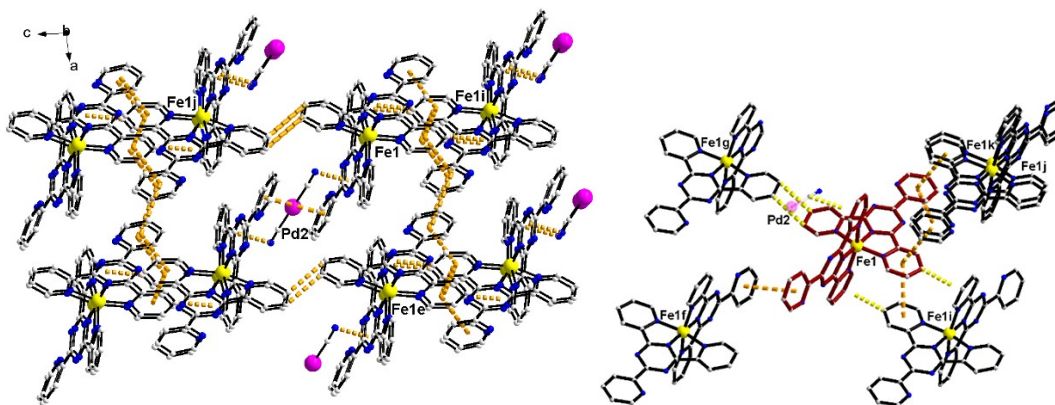

**Fig. S16.** Details of the crystal packing in **3** showing the offset and edge to face  $\pi$ - $\pi$  stacking interactions established between peripheral pyridine and triazine rings of neighboring tptz ligands. Symmetry codes: (i) = 1-x, 1-y, 1-z; (j) = 1-x, 2-y, 1-z; (k) = -x, 2-y, 1-z.

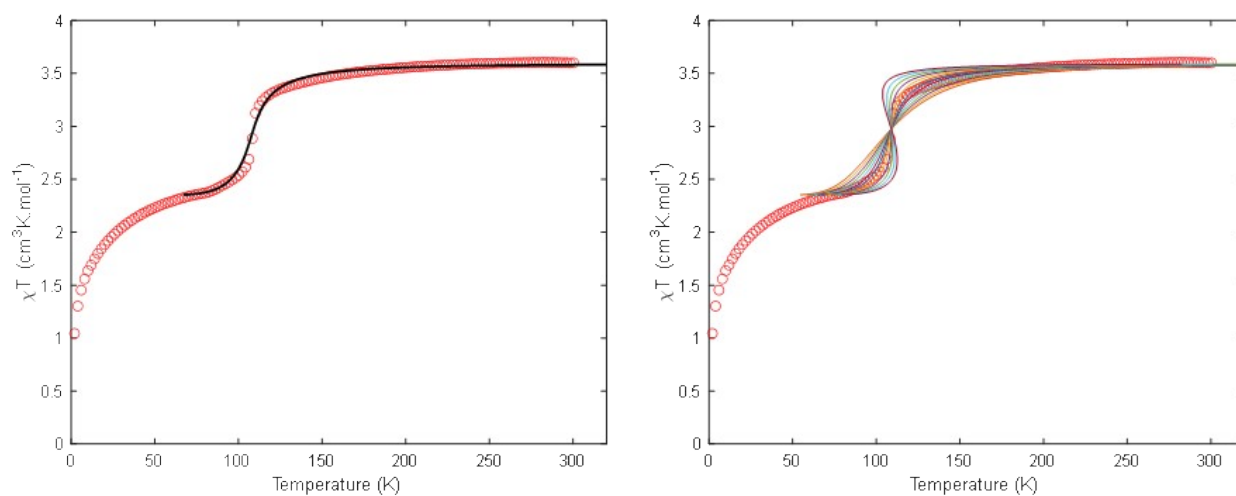

**Fig. S17.** Temperature dependence of magnetic susceptibility  $\chi T$  as a function of temperature ( $T$ ) for compound **1**. The solid line represents the theoretical simulated value according to the Slichter-Drickamer model<sup>52, 67</sup> for the upper portion of the data of magnetic susceptibility with parameter indicated below: left,  $\Delta H = 5.3$  kJ/mol,  $\Delta S = 48.62$  J/mol,  $\gamma = 1.2$  kJ/mol,  $\chi T(\text{HS}) = 3.6$   $\text{cm}^3 \cdot \text{mol}^{-1} \cdot \text{K}$ ,  $\chi T(\text{LS}) = 2.35$   $\text{cm}^3 \cdot \text{mol}^{-1} \cdot \text{K}$ ; right,  $\Delta H = 5.3$  kJ/mol,  $\Delta S = 48.62$  J/mol,  $\gamma = 0, 0.2, 2.4$  kJ/mol,  $\chi T(\text{HS}) = 3.6$   $\text{cm}^3 \cdot \text{mol}^{-1} \cdot \text{K}$ ,  $\chi T(\text{LS}) = 2.35$   $\text{cm}^3 \cdot \text{mol}^{-1}$ .
